# Supplementary material
Source: HighWire-hosted journal article supplement (doi:10.1101/rna.052118.115)
Supplement: SuppFig1Legend.docx [file SuppFig1Legend.docx]

**Supplementary Figure 1. RNase secondary structure assay of pri-let-7 isoforms.**

Polyacrylamide gel electrophoresis (PAGE) of T7 transcribed pri-let-7 isoforms (unspliced and SL1-spliced) that were 5’ end labeled, folded, and subject to treatment by RNase T1, V1, A, or buffer only. All nucleotide ladder (all nt) represents every base in the sequence, T1 indicates unpaired guanine bases, V1 indicates paired bases, A indicates unpaired cytosine and uracil bases. Labeled RNA marker (M) serves as a reference and is a combination of labeled Decade Marker and all nucleotide ladder. Gels are representative of at least four independent experiments.
